# Supplementary material for: The Division of Amyloid Fibrils: Systematic Comparison of Fibril Fragmentation Stability by Linking Theory with Experiments
Source: PubMed Central journal article supplement (PMC7492994; doi:10.1016/j.isci.2020.101512), 2020-08-29
Supplement: mmc1.pdf [file mmc1.pdf]

iScience, Volume 23

## **Supplemental Information**

### **The Division of Amyloid Fibrils: Systematic Comparison of Fibril Fragmentation Stability by Linking Theory with Experiments**

**David M. Beal, Magali Tournus, Ricardo Marchante, Tracey J. Purton, David P. Smith, Mick F. Tuite, Marie Doumic, and Wei-Feng Xue**

## SUPPLEMENTARY FIGURES

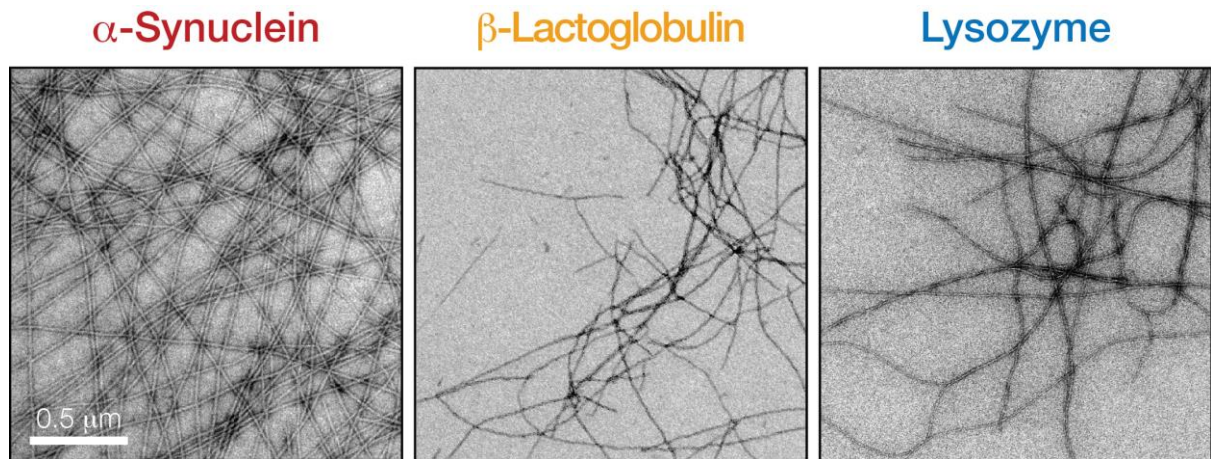

**Supplementary Figure S1. Negative-stain TEM validation of the initial pre-formed amyloid fibril samples. Related to Figure 2.** Initial human  $\alpha$ -Syn, bovine milk  $\beta$ -Lac, and hen egg white Lyz amyloid fibril samples (all 120  $\mu$ M monomer equivalent concentration) were deposited on glow-discharged, carbon coated Formvar copper grids and imaged using TEM after staining with 2% (w/v) uranyl acetate. Typical TEM images are shown with scale bar represents 500 nm in all images.

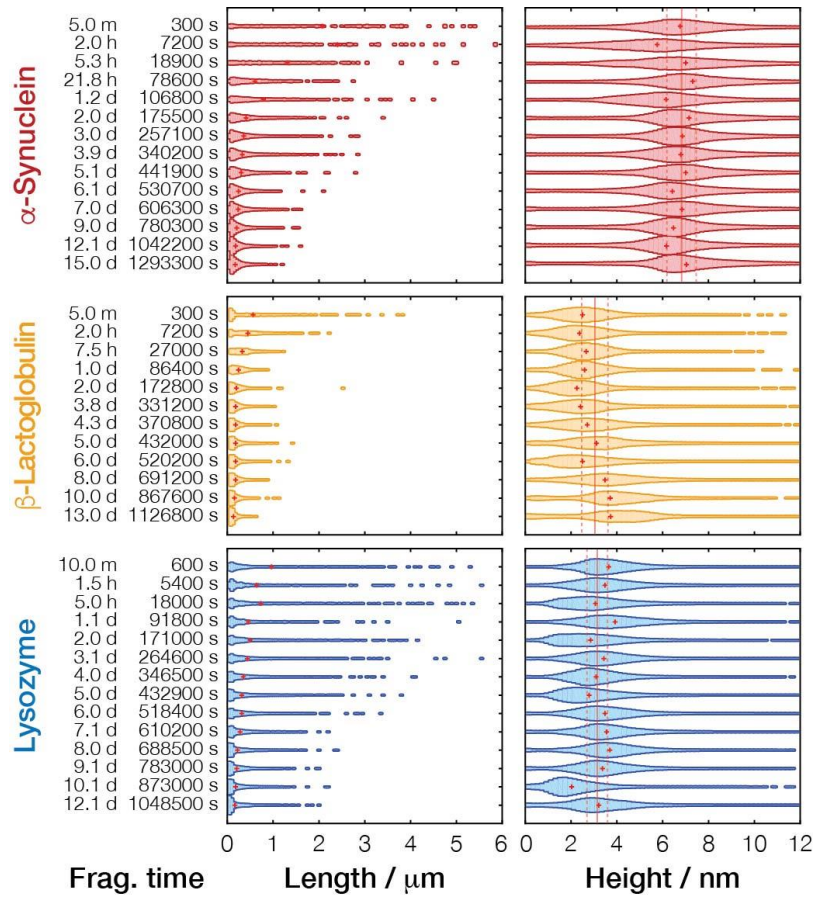

**Supporting Figure S2. Fibril length and height distributions extracted from AFM images for fibrils undergoing fragmentation by mechanical stirring. Related to Figure 3.** Typical experimental time course with normalized length (left plot of each sample) and height (right plot of each sample) distributions of fibril particles shown as violin plots. The width of the horizontal bars corresponds to the normalised frequencies observed at the length or height indicated by the x-axes. The bars for all samples are shown using the same length and height frequency scales, respectively, to facilitate comparison. The red crosses indicate mean values at each time point and the solid and dashed red lines for height plots indicate mean and standard deviation of all time points taken together, respectively.

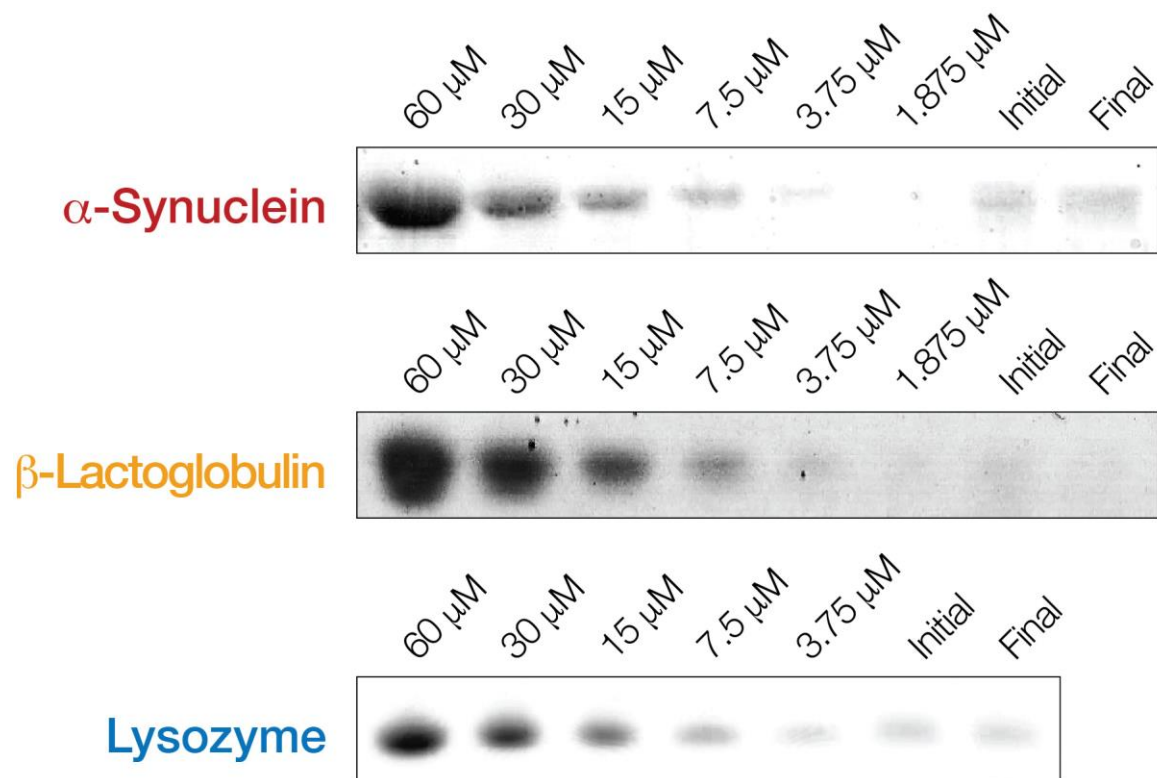

**Supporting Figure S3: Residual monomer assay before and after fibril fragmentation time courses. Related to Figure 3.** For each fibril type, protein content in the non-pellatable fractions of the initial sample before and Final sample after extended mechanical perturbation were visualised on SDS-PAGE gels together with loading standards of known protein concentrations. The difference in residual monomer concentration (difference between bands in the Initial and Final lanes) were less than 5 % in all cases.

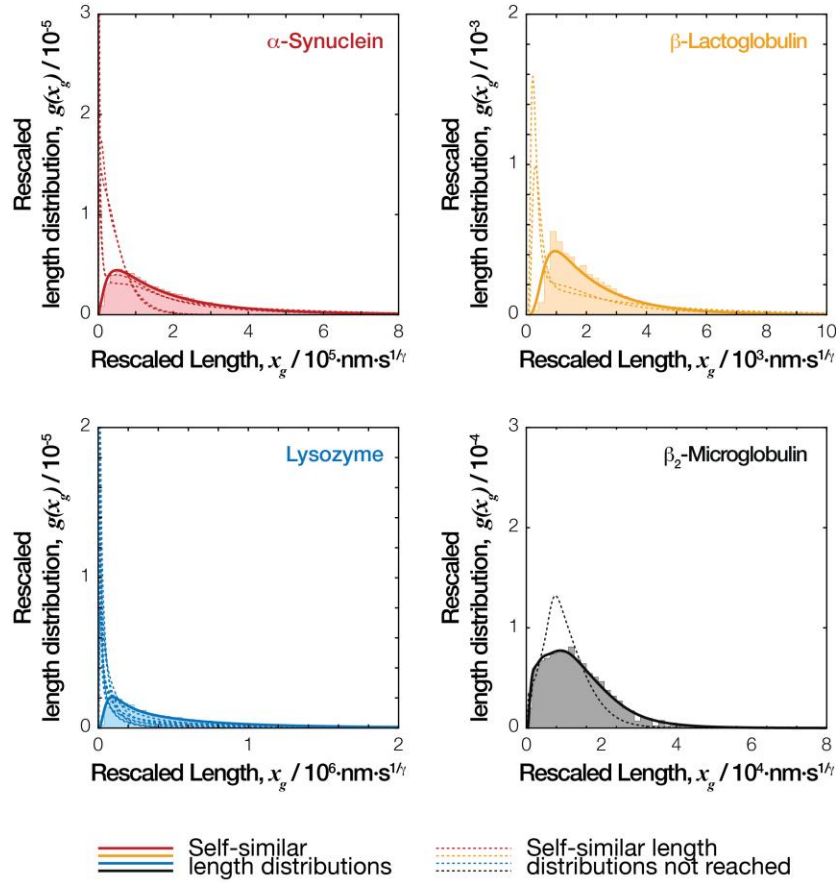

**Supporting Figure S4: The self-similar length distribution shape can be obtained from rescaling and averaging of the experimental normalised length distributions. Related to Figure 5.** The rescaled length distributions  $g(x_g)$  calculated with Eq. (5) are shown for each fibril type. For each fibril type analysed, the histograms and bold solid lines are the average of length distributions obtained from AFM imaging analysis that have reached the self-similar length distribution shapes, i.e. distributions at the time points consistent with Eq. (2) in the portion of the experiments represented by the solid lines in **Fig. 5**. for each fibril type. The dashed lines represent distributions from early experimental time-points where self-similarity has not been reached, demonstrating the large deviations from the self-similar distribution shape represented by the bold lines. The lines represent distributions calculated using the kernel density method to reduce clutter and facilitate visualisation and comparison.

**SUPPLEMENTARY TABLE**

**Supporting Table S1: Sample, AFM imaging, and quantitative image analysis statistics. Related to Figure 2 and 3.** Image analysis statistics for each sample and time point is shown. List of all raw fibril lengths is available upon request.

| <i>Samples</i>                        |                              | <i>AFM Imaging</i>      |                                        |                                                       | <i>Quantitative image Analysis</i> |                                               |                                  |                                     |
|---------------------------------------|------------------------------|-------------------------|----------------------------------------|-------------------------------------------------------|------------------------------------|-----------------------------------------------|----------------------------------|-------------------------------------|
| <i>Protein</i>                        | <i>Fragmentation Time /s</i> | <i>Number of Images</i> | <i>Image size / pixels<sup>†</sup></i> | <i>Scan size / <math>\mu\text{m}^{\dagger}</math></i> | <i>Mean Particle Length / nm</i>   | <i>Number of Fibril Particles<sup>◊</sup></i> | <i>Mean Particle Height / nm</i> | <i>Number of Pixels<sup>◦</sup></i> |
| <b><i><math>\alpha</math>-Syn</i></b> | 300                          | 6                       | 2048                                   | 20                                                    | 2075.8                             | 653                                           | 6.8                              | 49079                               |
|                                       | 7200                         | 5                       | 2048                                   | 20                                                    | 2402.9                             | 424                                           | 5.8                              | 32066                               |
|                                       | 18900                        | 3                       | 2048                                   | 20                                                    | 1311.6                             | 679                                           | 7.0                              | 43259                               |
|                                       | 78600                        | 2                       | 2048                                   | 20                                                    | 598.9                              | 1350                                          | 7.3                              | 53512                               |
|                                       | 106800                       | 2                       | 2048                                   | 20                                                    | 786.8                              | 1512                                          | 6.1                              | 63474                               |
|                                       | 175500                       | 2                       | 2048                                   | 20                                                    | 406.2                              | 3086                                          | 7.1                              | 92632                               |
|                                       | 257100                       | 2                       | 2048                                   | 20                                                    | 360.1                              | 4087                                          | 6.8                              | 110048                              |
|                                       | 340200                       | 2                       | 2048                                   | 20                                                    | 330.6                              | 4257                                          | 6.8                              | 110024                              |
|                                       | 441900                       | 2                       | 2048                                   | 20                                                    | 301.8                              | 2723                                          | 7.0                              | 67278                               |
|                                       | 530700                       | 2                       | 2048                                   | 20                                                    | 244.7                              | 5064                                          | 6.4                              | 110431                              |
|                                       | 606300                       | 2                       | 2048                                   | 20                                                    | 241.4                              | 6104                                          | 6.8                              | 129898                              |
|                                       | 780300                       | 2                       | 2048                                   | 20                                                    | 208.9                              | 6707                                          | 6.5                              | 129581                              |
|                                       | 1042200                      | 2                       | 2048                                   | 20                                                    | 185.6                              | 6412                                          | 6.1                              | 113509                              |
|                                       | 1293300                      | 2                       | 2048                                   | 20                                                    | 173.6                              | 5346                                          | 7.0                              | 90832                               |
|                                       | 300                          | 5                       | 2048                                   | 20                                                    | 2183.7                             | 507                                           | 7.5                              | 37725                               |
|                                       | 5400                         | 5                       | 2048                                   | 20                                                    | 1756.2                             | 394                                           | 7.0                              | 24323                               |
|                                       | 18000                        | 2                       | 2048                                   | 20                                                    | 1303.7                             | 635                                           | 7.8                              | 36938                               |
|                                       | 91800                        | 2                       | 2048                                   | 20                                                    | 620.7                              | 2293                                          | 7.2                              | 87165                               |
|                                       | 107400                       | 2                       | 2048                                   | 20                                                    | 568.5                              | 2304                                          | 7.4                              | 80443                               |

|                                          |   |      |    |       |      |     |        |
|------------------------------------------|---|------|----|-------|------|-----|--------|
| 195900                                   | 2 | 2048 | 20 | 439.7 | 2416 | 7.2 | 77497  |
| 259200                                   | 2 | 2048 | 20 | 390.5 | 3264 | 7.1 | 93323  |
| 430500                                   | 2 | 2048 | 20 | 276.7 | 4807 | 6.9 | 114822 |
| 610200                                   | 2 | 2048 | 20 | 224.3 | 6253 | 7.1 | 128690 |
| 691200                                   | 2 | 2048 | 20 | 205.2 | 7541 | 6.8 | 145181 |
| 766200                                   | 2 | 2048 | 20 | 194.0 | 5705 | 6.4 | 106589 |
| 863700                                   | 2 | 2048 | 20 | 181.7 | 8086 | 6.5 | 143206 |
| 1119600                                  | 2 | 2048 | 20 | 172.0 | 9532 | 6.4 | 161606 |
| 1219800                                  | 2 | 2048 | 20 | 163.6 | 9470 | 6.3 | 154357 |
| 1380900                                  | 2 | 2048 | 20 | 158.3 | 8811 | 6.8 | 139488 |
| <i><b><math>\beta</math>-Lac</b></i> 300 | 2 | 2048 | 20 | 560.2 | 496  | 2.5 | 28968  |
| 7200                                     | 2 | 2048 | 20 | 451.8 | 854  | 2.4 | 40389  |
| 27000                                    | 1 | 2048 | 20 | 329.7 | 751  | 2.7 | 26125  |
| 86400                                    | 1 | 2048 | 20 | 244.7 | 1023 | 2.6 | 26678  |
| 172800                                   | 1 | 2048 | 20 | 200.8 | 1482 | 2.3 | 32010  |
| 331200                                   | 2 | 2048 | 20 | 183.0 | 2637 | 2.4 | 52129  |
| 370800                                   | 1 | 2048 | 20 | 186.0 | 1112 | 2.7 | 22330  |
| 432000                                   | 2 | 2048 | 20 | 185.2 | 2180 | 3.1 | 43588  |
| 520200                                   | 2 | 2048 | 20 | 181.1 | 2190 | 2.5 | 42867  |
| 691200                                   | 2 | 2048 | 20 | 181.0 | 1945 | 3.5 | 38036  |
| 867600                                   | 1 | 2048 | 20 | 163.2 | 922  | 3.7 | 16349  |
| 1126800                                  | 1 | 2048 | 20 | 134.2 | 1138 | 3.7 | 16819  |
| 1800                                     | 3 | 2048 | 20 | 680.8 | 898  | 2.0 | 63514  |
| 3600                                     | 2 | 2048 | 20 | 495.8 | 977  | 2.9 | 50594  |
| 87588                                    | 1 | 2048 | 20 | 304.6 | 2649 | 3.1 | 85313  |
| 107712                                   | 2 | 2048 | 20 | 310.3 | 2761 | 2.9 | 90538  |
| 182376                                   | 3 | 2048 | 20 | 254.9 | 4664 | 2.9 | 126499 |
| 437688                                   | 3 | 2048 | 20 | 236.1 | 3379 | 3.2 | 85122  |
| 519876                                   | 2 | 2048 | 20 | 233.7 | 1957 | 3.6 | 48815  |
| 624276                                   | 4 | 2048 | 20 | 229.9 | 3511 | 3.4 | 86233  |
| 693000                                   | 2 | 2048 | 20 | 234.0 | 1752 | 3.7 | 43764  |
| 777312                                   | 2 | 2048 | 20 | 237.0 | 1809 | 3.7 | 45739  |
| 1058400                                  | 2 | 2048 | 20 | 230.0 | 830  | 3.7 | 20388  |
| 1218960                                  | 2 | 2048 | 20 | 213.2 | 1465 | 3.2 | 33468  |

|                                  |         |    |      |    |        |      |     |        |
|----------------------------------|---------|----|------|----|--------|------|-----|--------|
|                                  | 1296000 | 3  | 2048 | 20 | 221.0  | 2109 | 3.5 | 49869  |
| <i>Lyz</i>                       | 300     | 3  | 2048 | 20 | 1436.6 | 437  | 3.1 | 38771  |
|                                  | 1800    | 2  | 2048 | 20 | 364.7  | 632  | 3.4 | 18882  |
|                                  | 3600    | 2  | 2048 | 20 | 881.6  | 750  | 3.1 | 35831  |
|                                  | 7200    | 2  | 2048 | 20 | 1273.2 | 610  | 3.0 | 41984  |
|                                  | 14400   | 2  | 2048 | 20 | 1103.4 | 519  | 3.1 | 35986  |
|                                  | 28800   | 2  | 2048 | 20 | 1014.9 | 713  | 3.0 | 45954  |
|                                  | 86400   | 2  | 2048 | 20 | 612.0  | 1500 | 3.5 | 79606  |
|                                  | 172800  | 2  | 2048 | 20 | 333.6  | 2007 | 2.8 | 65634  |
|                                  | 346600  | 2  | 2048 | 20 | 242.5  | 2592 | 2.9 | 64844  |
|                                  | 432000  | 2  | 2048 | 20 | 211.3  | 4020 | 2.7 | 88812  |
|                                  | 604800  | 1  | 2048 | 20 | 172.9  | 4270 | 2.8 | 78168  |
|                                  | 1123200 | 2  | 2048 | 20 | 92.5   | 3419 | 2.6 | 35582  |
|                                  | 600     | 3  | 2048 | 20 | 959.5  | 1402 | 3.6 | 69144  |
|                                  | 5400    | 2  | 2048 | 20 | 591.9  | 1019 | 3.4 | 42686  |
|                                  | 18000   | 2  | 2048 | 20 | 720.0  | 1125 | 3.0 | 55008  |
|                                  | 91800   | 1  | 2048 | 20 | 448.8  | 541  | 3.9 | 20366  |
|                                  | 171000  | 2  | 2048 | 20 | 495.9  | 1934 | 2.8 | 79284  |
|                                  | 264600  | 3  | 2048 | 20 | 439.9  | 3423 | 3.4 | 133898 |
|                                  | 346500  | 3  | 2048 | 20 | 351.2  | 4049 | 3.1 | 133400 |
|                                  | 432900  | 3  | 2048 | 20 | 315.0  | 4798 | 2.8 | 145233 |
|                                  | 518400  | 2  | 2048 | 20 | 313.9  | 3263 | 3.5 | 100009 |
|                                  | 610200  | 1  | 2048 | 20 | 275.7  | 1452 | 3.5 | 39803  |
|                                  | 688500  | 1  | 2048 | 20 | 223.1  | 2100 | 3.7 | 47373  |
|                                  | 783000  | 1  | 2048 | 20 | 207.7  | 2082 | 3.3 | 44558  |
|                                  | 873000  | 1  | 2048 | 20 | 181.7  | 3059 | 2.0 | 57672  |
|                                  | 1048500 | 1  | 2048 | 20 | 164.3  | 2865 | 3.2 | 49244  |
| <i><math>\beta_{2m}^*</math></i> | 540     | 16 | 1024 | 10 | 1002.0 | 468  | 5.9 | 36896  |
|                                  | 3300    | 8  | 1024 | 10 | 746.8  | 515  | 5.4 | 29583  |
|                                  | 8280    | 6  | 1024 | 10 | 616.2  | 650  | 5.5 | 29184  |
|                                  | 16920   | 4  | 1024 | 10 | 506.6  | 603  | 5.7 | 22650  |
|                                  | 39240   | 4  | 1024 | 10 | 380.2  | 859  | 4.6 | 25747  |
|                                  | 84240   | 4  | 1024 | 10 | 301.7  | 1037 | 5.9 | 26177  |
|                                  | 108000  | 4  | 1024 | 10 | 266.0  | 1298 | 4.8 | 28612  |



\* Reanalysis of data from Xue and Radford, 2013

† Indicating scan size in  $\mu\text{m} \times \mu\text{m}$  and image size in pixels  $\times$  pixels as image aspect ratio was 1 throughout.

◇ Total number of fibril particles quantified for constructing the fibril length distributions.

° Total number of pixel height values in the fibril height distributions for fibril width evaluations.

## THEORY

### The self-similar division equation

We first explain here the origins of Eq. (1) in the Main Text as well as the assumptions associated with this equation. Let us denote the fibril length distribution  $u(t, x)$  as the particle concentration of fibrils of length  $x > 0$  at time  $t$ ,  $B(x) \geq 0$  as the division rate constant for fibrils of length  $x$  (assumed to be independent of time), and  $\kappa(y, dx)$  the probability that a dividing fibril of length  $y$  gives rise to two fibrils of size  $x$  and  $y - x$  (Fig. 1b). The  $\kappa$ , often called fragmentation kernel, is nonnegative and satisfies the following properties:

$$\int_0^y \kappa(y, dx) = 1, \quad \kappa(y, x > y) = 0, \quad \kappa(y, x) = \kappa(y, y - x)$$

Eq. (S1)

The last property above is a symmetry property linked to the assumption that we consider only division into two daughter fibrils for each microscopic step, and the fibrils are isotropic along the axis of the filament so the division rate only depends on the length of the resulting two fibrils (**Fig. 1c** and **1d**). The first two properties of Eq. (S1) express that  $\kappa(y, dx)$  is a normalised probability density function, and that daughter fibrils post-division are always shorter than their mother fibril. The time dependent concentration of fibrils  $u(t, x)$  then satisfies the following equation:

$$\frac{\partial}{\partial t} u(t, x) = -B(x)u(t, x) + 2 \int_{y=x}^{\infty} \kappa(y, x)B(y)u(t, y)dy, \quad u(0, x) = u_0(x)$$

Eq. (S2)

where  $u_0(x)$  is the initial length distribution of fibrils. Equation (S2) is the continuous division equation, which describes the evolution  $\frac{\partial}{\partial t} u(t, x)$  of the fibril particle concentrations in the fibril length

distribution  $u(t, x)$  with respect to time  $t$ . It states that fibrils of a given length  $x$  in the sample distribution will be consumed with a rate  $B(x)$  when they divide into smaller daughter fibrils, and that fibrils of the same length  $x$  may also appear in the sample distribution each time a fibril of size  $y > x$  divides into two fibrils of size  $x$  and  $y - x$ . Let us denote the total initial mass of fibrils as  $\rho = \int_0^\infty x u_0(x) dx$ . Since the mass is conserved through time:  $\int_0^\infty x u(t, x) dx = \rho$ . We also assume, in line with previous theoretical (Hill, 1983) and experimental results (Xue and Radford, 2013), that the division rate constant is given by a power law:

$$B(x) = \alpha_0 (\alpha x)^\gamma, \quad \alpha > 0, \quad \gamma > 0$$

Eq. (S3)

and that the site where a fragmenting fibril of size  $y$  breaks down only depend on the relative position of its site along the mother fibril, defined by the ratio  $x/y$  where  $x$  is the length of one of the two daughter fibrils. This property is called a “self-similar” division and is translated mathematically with fragmentation kernel  $\kappa$  as the following:

$$\kappa(y, x) := \frac{1}{y} \kappa_0 \left( \frac{x}{y} \right)$$

Eq. (S4)

where the properties described by Eq. (S1), when transferred to the probability density  $\kappa_0$ , and with  $z = \left( \frac{x}{y} \right)$ , satisfies the following:

$$\int_0^1 \kappa_0(z) dz = 1, \quad \kappa_0(z > 1) = 0, \quad \kappa_0(z) = \kappa_0(1 - z)$$

Eq. (S5)

Two important examples may be viewed as special cases of self-similar fragmentation kernels above. The first one is the case of division of uniform probability: the parent fibril can break at any site along its length with an equal probability, so that  $\kappa_0 \left( \frac{x}{y} \in (0, 1) \right) = 1$ . The second special division case is

sometimes referred to as the “equal mitosis case” from its roots in describing cellular divisions, where the parent fibril divides exactly at the middle, so that we have a Dirac delta function at  $\kappa_0\left(\frac{1}{2}\right): \kappa_0\left(\frac{x}{y}\right) = \frac{\delta_{x=\frac{y}{2}}}{y^{\frac{1}{2}}}$ . Using all of the properties and assumptions above, the continuous division equation Eq. (S2) then

becomes:

$$\frac{\partial}{\partial t} u(t, x) = -\alpha_0(\alpha x)^\nu u(t, x) + 2 \int_{y=x}^{\infty} \frac{1}{y} \kappa_0\left(\frac{x}{y}\right) \alpha_0(\alpha x)^\nu u(t, y) dy$$

Eq. (S6)

which is equation Eq. (1) in the Main text.

### Long-time behaviour of the continuous division equation

For our continuous division equation Eq. (1) and (S6), it has been proven in (Escobedo et al., 2005) that for long times, there exists a unique probability density function  $g$  and a constant  $C_g > 0$  such that:

$$u(t, x) \xrightarrow[t \rightarrow \infty]{} C_g t^{\frac{2}{\nu}} g(x_g), \quad x_g = x t^{\frac{1}{\nu}}$$

Eq. (S7)

The constant  $C_g$  is introduced to ensure mass conservation, which holds for any time  $t$ . Eq. (S7) means that for large times, the probability density  $u$  tends towards a specific distribution shape  $g$  after variable rescaling. Moreover, the function  $g$  is defined as the unique solution to the following equation:

$$x_g \frac{dg(x_g)}{dx_g} + (2 + \alpha \gamma x_g^\nu) g(x_g) = 2\alpha \gamma \int_{y_g=x_g}^{\infty} \frac{1}{y_g} \kappa_0\left(\frac{x_g}{y_g}\right) y_g^\nu g(y_g) dy_g, \quad \int_0^{\infty} g(y_g) dy_g = 1$$

Eq. (S8)

We can then compute the constant  $C_g$  as the following:

$$\int_0^{\infty} xu(t, x)dx = \rho = C_g \int_0^{\infty} t^{\frac{2}{\nu}} x g\left(xt^{\frac{1}{\nu}}\right) dx = C_g \int_0^{\infty} x_g g(x_g) dx_g \implies C_g = \frac{\rho}{\int_0^{\infty} x_g g(x_g) dx_g}$$

Eq. (S9)

We then relate these results to our experimental measurements. First, since we measure at successive time points small aliquots taken from the fibril samples, these samplings may be viewed as measurements of the length distribution of the fibril sample at time points  $t$ . We also do not measure directly  $u(t, x)$ , since the total number of fibrils is not known *a priori* for each time point. Instead, we measure the normalised length distribution  $f(t, x)$  as described below. Using Eq. (S7-S9), we then have the following:

$$\int_0^{\infty} u(t, x) dx \xrightarrow{t \rightarrow \infty} C_g \int_0^{\infty} t^{\frac{2}{\nu}} g\left(xt^{\frac{1}{\nu}}\right) dx = C_g t^{\frac{1}{\nu}} \int_0^{\infty} g(x_g) dx_g = C_g t^{\frac{1}{\nu}}$$

Eq. (S10)

We can define  $f(t, x)$  as the normalised fibril length distribution that can be assessed using the experimental image data:

$$f(t, x) = \frac{u(t, x)}{\int_0^{\infty} u(t, x) dx}$$

Eq. (S11)

Using this definition of  $f(t, x)$  from, we then have:

$$f(t, x) \xrightarrow{t \rightarrow \infty} \frac{C_g t^{\frac{2}{\nu}} g(x_g)}{C_g t^{\frac{1}{\nu}}} = t^{\frac{1}{\nu}} g(x_g), \quad x_g = xt^{\frac{1}{\nu}}$$

Eq. (S12)

which is equation Eq. (3) of the main text. Next, defining the average length of fibrils  $\mu(t)$  as the experimentally tractable time-dependent mean length of the fibril length distribution defined as:

$$\mu(t) = \int_0^{\infty} x \cdot f(t, x) dx$$

Eq. (S13)

We have the following relationship:

$$\mu(t) := \int_0^{\infty} x f(t, x) dx \xrightarrow{t \rightarrow \infty} \int_0^{\infty} x t^{\frac{1}{\gamma}} g\left(x t^{\frac{1}{\gamma}}\right) dx = t^{-\frac{1}{\gamma}} \int_0^{\infty} x_g g(x_g) dx_g = C t^{-\frac{1}{\gamma}},$$

$$C = \int_0^{\infty} x_g g(x_g) dx_g$$

Eq. (S14)

which is the relationship between the average length of fibrils and time  $t$  in equation Eq. (2) of the main text.

### Estimating the division parameters $\alpha$ and $\gamma$

We first estimate  $\gamma$  by fitting a modified version of Eq. (2) to the average lengths  $\mu(t)$  estimated from the experimentally observed fibril length distributions for sufficiently long times (see Eq. S22 in Transparent Methods). Then, we estimate  $\alpha$  from  $\gamma$  and  $g$  using Eq. (S8). Integration of Eq. (S8) yields:

$$\int_0^{\infty} x_g \frac{dg(x_g)}{dx_g} dx_g + \int_0^{\infty} 2g(x_g) dx_g + \alpha \gamma \int_0^{\infty} x_g^{\gamma} g(x_g) dx_g = 2\alpha \gamma \int_0^{\infty} \int_{y_g=x_g}^{\infty} \frac{1}{y_g} \kappa_0 \left( \frac{x_g}{y_g} \right) y_g^{\gamma} g(y_g) dy_g dx_g$$

Eq. (S15)

We can integrate Eq. (S15) by parts the first term, and we use Fubini's theorem to invert the integral order in the last term:

$$-\int_0^{\infty} g(x_g) dx_g + \int_0^{\infty} 2g(x_g) dx_g + \alpha\gamma \int_0^{\infty} x_g^\gamma g(x_g) dx_g = 2\alpha\gamma \int_0^{\infty} \int_{x_g=0}^{y_g} \frac{1}{y_g} \kappa_0\left(\frac{x_g}{y_g}\right) y_g^\gamma g(y_g) dx_g dy_g$$

Eq. (S16)

We then use the fact that  $g$  is normalised,  $\int_0^{\infty} g(y_g) dy_g = 1$ , and change the variable  $x_g$  to  $z = \left(\frac{x_g}{y_g}\right)$  to

obtain:

$$1 + \alpha\gamma \int_0^{\infty} x_g^\gamma g(x_g) dx_g = 2\alpha\gamma \int_0^{\infty} \int_{z=0}^1 \kappa_0(z) y_g^\gamma g(y_g) dz dy_g$$

Eq. (S17)

Using the property  $\int_0^1 \kappa_0(z) dz = 1$  from Eq. (S1), we obtain:

$$1 = \alpha\gamma \int_0^{\infty} x_g^\gamma g(x_g) dx_g$$

Eq. (S18)

To relate  $\alpha$  directly to the experimentally characterised  $f(t,x)$  rather than on  $g$ , we multiply the equation Eq. (S12), i.e. Eq. (3) of the main text, by  $x^\gamma$  and integrate it to obtain the following:

$$\int_0^{\infty} x^\gamma f(t,x) dx \xrightarrow{t \rightarrow \infty} \int_0^{\infty} x^\gamma t^{\frac{1}{\gamma}} g\left(xt^{\frac{1}{\gamma}}\right) dx = \int_0^{\infty} x_g^\gamma t^{-1} g(x_g) dx_g$$

Eq. (S19)

Rearranging Eq. (S18) and using Eq. (S19), we obtain:

$$\alpha = \frac{1}{\gamma} \frac{1}{\int_0^{\infty} x_g^\gamma g(x_g) dx_g} \xrightarrow{t \rightarrow \infty} \frac{1}{\gamma} \frac{t^{-1}}{\int_0^{\infty} x^\gamma f(t,x) dx}$$

Eq. (S20)

Therefore, we get the following relationship:

$$\alpha \approx \frac{1}{\gamma} \frac{t^{-1}}{\int_0^\infty x^\gamma f(t, x) dx}, \quad t \gg t_0$$

Eq. (S21)

which is used to estimate  $\alpha$  from experimental data. For more details, we also refer the interested reader to Doumic et al., 2018, and more specifically to Lemma 1 and Eq. (3.3) in this reference.



## **TRANSPARENT METHODS**

### **Preparation of protein monomers**

Hen egg white Lyz and bovine  $\beta$ -Lac proteins were both purchased from Sigma-Aldrich and used with no further purification. Production and purification of human  $\alpha$ -Syn monomers was achieved according to the method of Cappai et al (Cappai et al., 2005), with the addition of a stepped ammonium sulphate precipitation (30% to 50%) step prior to anion exchange chromatography. The protein was buffer exchanged using PD10 desalting column (GE Healthcare) prior to loading onto the anion exchange resin.

### ***In vitro* formation of amyloid fibril samples**

The conversion of Lyz and  $\beta$ -Lac to amyloid fibres was achieved under acidic and heated conditions. Both proteins were dissolved in 10 mM HCl to a concentration of 15mg/ml and then incubated for 4 hr at 25 °C. The resulting solutions were filtered through a 0.2  $\mu$ m syringe filter and diluted to a concentration of 10mg/ml (Lyz = 699  $\mu$ M and  $\beta$ -Lac = 547  $\mu$ M). 500  $\mu$ l aliquots were then heated without agitation for differing periods of time, with Lyz heated at 60 °C for 2 days and  $\beta$ -Lac heated at 90 °C for 5 hr.  $\alpha$ -Syn fibrils were formed by buffer exchange of purified monomers into fibril forming buffer (20mM Sodium phosphate, pH7.5) using a PD-10 column (GE Healthcare). The resulting  $\alpha$ -Syn solution was passed through a 0.2  $\mu$ m syringe filter. Protein concentration was subsequently determined via absorbance at 280nm, and the sample solution were diluted to 300  $\mu$ M and incubated at 37 °C in a shaking incubator with agitation set at 200 rpm for at least two weeks.

### **Controlled fibril fragmentation through mechanical perturbation**

Parent fibril solutions were diluted to 120  $\mu\text{M}$  using the appropriate fibril forming buffer for each protein in a snap cap vial containing an 8 x 3 mm PTFE coated magnetic stirrer bar and then subjected to stirring at 1000 rpm on an IKA squid stirrer plate with digital speed display. At appropriate time points, small aliquots of the fibril samples were removed, diluted with fibril forming buffer (deposition concentration for  $\alpha$ -synuclein is 0.48  $\mu\text{M}$ ,  $\beta$ -lactoglobulin is 0.6  $\mu\text{M}$  and Lyz is 6  $\mu\text{M}$ ), and 20  $\mu\text{l}$  were immediately taken and incubated for 5 min on freshly cleaved mica surfaces (Agar Scientific F7013). The mica surfaces were subsequently washed with 1 ml of syringe filtered (0.2  $\mu\text{m}$ ) mQ  $\text{H}_2\text{O}$  and dried under a gentle stream of  $\text{N}_2(\text{g})$ .

### **Determination of residual monomer concentration**

Residual monomer concentration for each fragmentation sample were measured using SDS-PAGE after centrifugation (75000 rpm, 15 min) with 100  $\mu\text{l}$  of the 120  $\mu\text{M}$  fragmentation reaction and 100  $\mu\text{l}$  of 120  $\mu\text{M}$  non-fragmented parent fibrils samples. The top 10 $\mu\text{l}$  of the solutions were then removed and treated with 4x loading dye and boiled at 95  $^\circ\text{C}$  for 5 min (Lyz samples were heated to 65  $^\circ\text{C}$  and beta-mercaptoethanol was not added due to decomposition of samples). The samples were then run against a serial dilution of monomeric protein standards on either a Tris-Tricine gel or a 15% Tris-Glycine gel at 180V and subsequently stained with Coomassie blue. Analysis of the protein bands was carried out by densitometry for comparison of bands to the serial dilution bands.

### **AFM imaging and image analysis**

The fibril samples were imaged on a Bruker Multimode 8 scanning probe microscope with a Nanoscope V controller, using the ScanAsyst peak-force tapping imaging mode. Bruker ScanAsyst probes (Silicone nitride tip with tip height = 2.5-8  $\mu\text{m}$ , nominal tip radius = 2 nm, nominal spring constant 0.4 N/m and nominal resonant frequency 70 kHz) were used throughout. Multiple 20  $\mu\text{m}$  x 20  $\mu\text{m}$  areas of the surface were scanned at a resolution of 2048 x 2048 pixels. The images were then processed and flattened using Bruker Nanoscope Analysis software to remove tilt and bow. The images were then

imported into Matlab, where length of individual fibril particles was measured. The sample length and height distributions were obtained as previously described (Xue, 2013; Xue et al., 2009). For the fibril length distributions, any length-dependent bias in a deposition for imaging or during the fibril tracing step of image analysis was taken into account as previously described (Xue et al., 2009).

### Data analysis of fibril division properties

The normalised length distribution of the fibril samples measured by AFM at time  $t$ ,  $f(t, x)$ , is linked to the concentration of fibrils solution  $u(t, x)$  in Eq. (1) by the relation in Eq. (SI.11). Mean lengths for each time point  $\mu(t)$  were calculated from the experimental  $f(t, x)$  distributions and Eq. (2) and (4) where used to first extract  $\gamma$  from the datasets. Because some unknown number of experimentally measured length distributions at early time points in the experiments may not have sufficiently reached the self-similar distribution at the asymptotic line (i.e. where Eq. (2) does not apply), we fit the following equation Eq. (4) to the average length as function of time data instead of Eq. (2) directly in order to estimate the number of experimental time points consistent with the self-similar distribution shape objectively without human input:

$$\begin{cases} \mu(t) = C \cdot t^{-1/\gamma}; & t > t_s \\ \mu(t) = C \cdot t_s^{-1/\gamma}; & t \leq t_s \end{cases}$$

Eq. (S22)

Eq. (4) was fit to the average length  $\mu(t)$  as function of time  $t$ , with  $C$  and  $t_s$  as parameters individual to each experimental dataset and  $\gamma$  as a global parameter for datasets from the same fibril type. Subsequently, the  $g(x_g)$  and  $\alpha$  values were calculated with Eq. (3) and (SI.21), respectively, both using  $\gamma$  calculated above and experimental normalised length distributions  $f(t, x)$  where  $t > t_s$ . For both the  $g(x_g)$  distributions and  $\alpha$  values, averages were obtained for each fibril type. The self-similar distribution shapes  $g(x_g)$  were used to calculate length distribution at any time using the reverse of Eq. (3). The  $\alpha$  and  $\gamma$  values were used to calculate the division rate constant  $B(x) = \alpha_0(\alpha x)^\gamma$  for fibrils of

any length  $x$ . Supplementary information section contains further information on the mathematical considerations of our division model.

### **Direct numerical simulation of fibril division processes**

To validate the  $\alpha$  and  $\gamma$  values obtained from our analysis, direct numerical simulations to calculate the time evolution of the fibril length distributions were carried out by numerically solving the full ODE system describing the master equation mostly as described in Xue and Radford, 2013 but with a few modifications. Firstly, numerical integrations of the master equation were solved for fibril species containing up to 30,000 instead of 20,000 monomeric units in order to retain concentration errors introduced by numerical inaccuracy and truncation of larger species to <1%. Secondly, the number of division sites was assumed to be equal to the number of monomers-1 and the unit used for the length of fibrils was interconverted in the simulations from nanometres ( $x$  in [nm] units) to the number of monomers ( $i$  number of monomers) using the numbers of monomers per nm length unit  $N_l$  (Xue and Radford, 2013) as conversion factor. Subsequently, assuming that division sites along the fibrils operate independently, the microscopic rate constant on per division site basis is  $B(i)\kappa_0$  divided by the number of monomers-1. Thirdly, as  $g(x_g)$  shape for Lyz and  $\alpha$ -Syn fibril divisions suggest a  $\kappa_0$  function that result in similar division rates in the fibril centre and fibril edge, simulations for these two fibril types were carried out using Eq. S6 in Xue and Radford 2013 instead of Eq. S8. Finally, the experimental distribution at the first time-points (including all the experimental noise) were directly used as the initial distribution (dashed lines in **Fig. 6**) instead of parameterised distributions (Xue et al., 2009) in the simulations to illustrate the fact that our model has shown that the self-similar distribution shape will be reached independently of the initial length distribution.
